# Supplementary material for: Adolescent Health Services in a Primary Care Facility in Northern Ghana: A Qualitative Investigation of Patients’, Guardians’, and Staff’s Perceptions of Care
Source: Research Square preprint supplement (doi:10.21203/rs.3.rs-7465828/v1), 2025-09-19
Supplement: Supplementary file 1 [file 35a568b42566a6d7fd7c52b8.pdf]

**ADOLESCENT SERVICE DELIVERY PATHWAY 1**

**TERTIARY / TEACHING HOSPITALS**

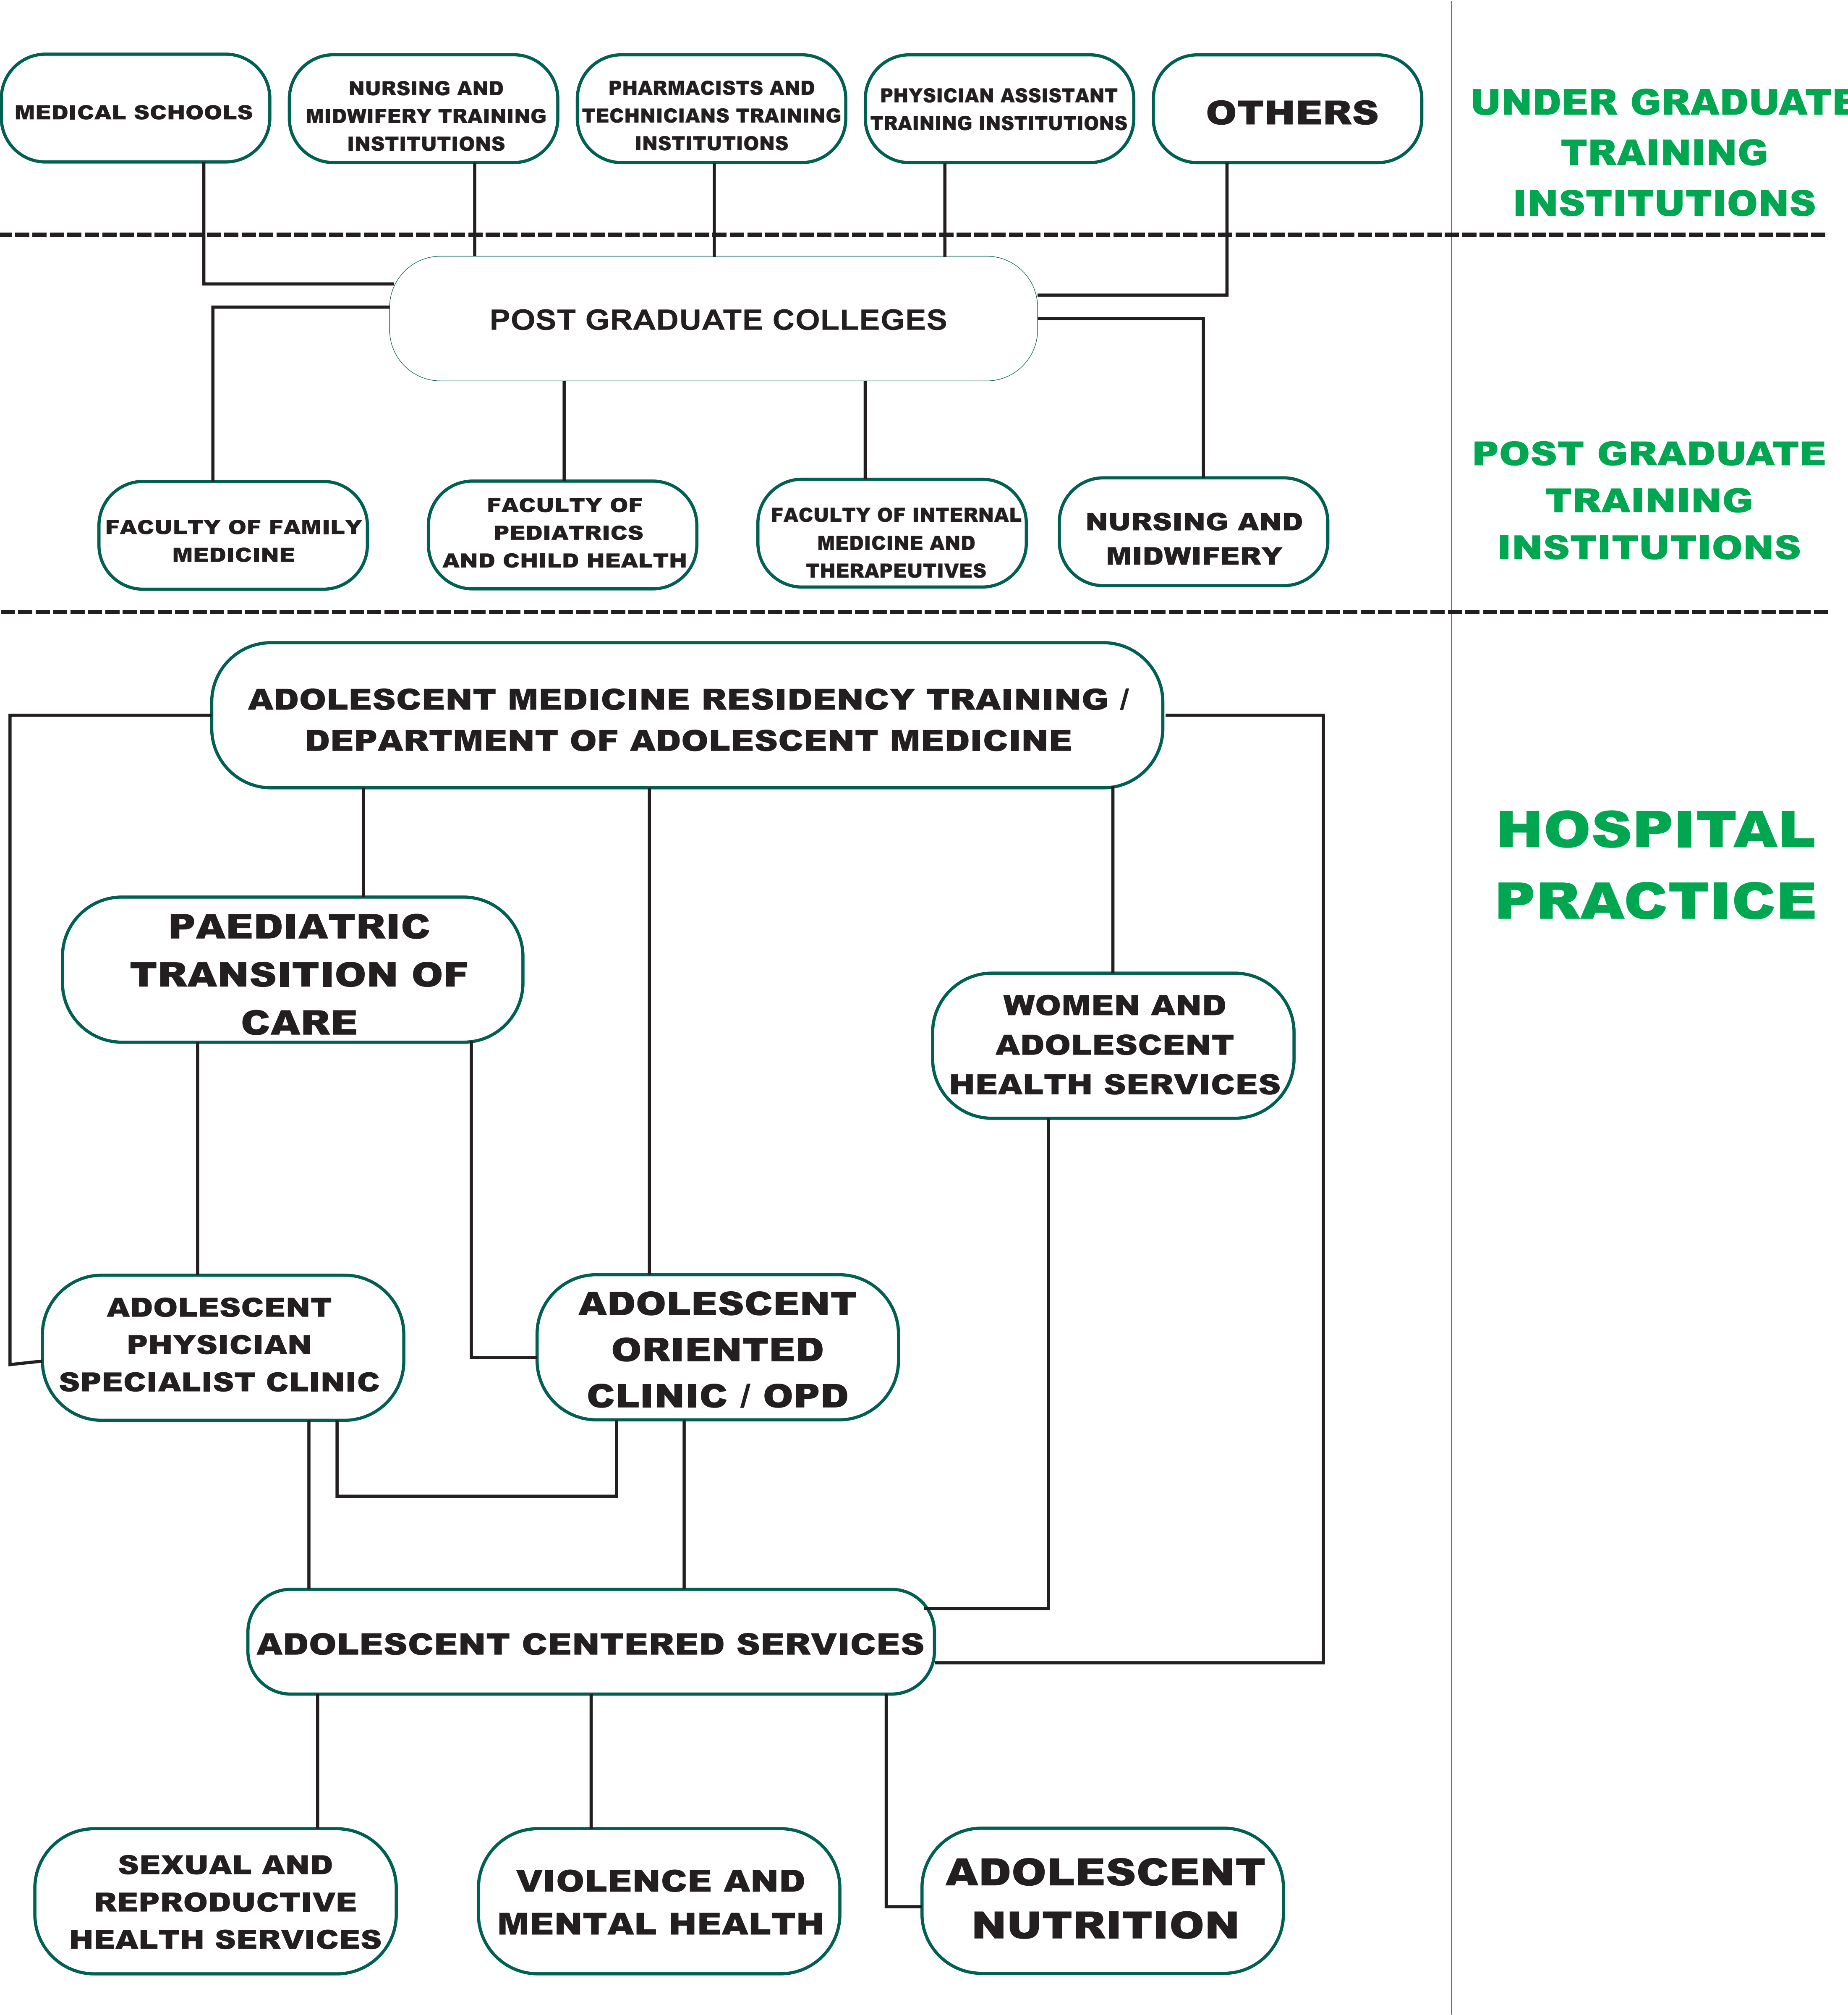

This schema depicts the authors conceptualization of integration of Adolescent Health curricula into pre-service training institutions and postgraduate colleges and subsequent service delivery pathway. The schema is an original work of the authors.
