# Supplementary material for: Adolescent Health Services in a Primary Care Facility in Northern Ghana: A Qualitative Investigation of Patients’, Guardians’, and Staff’s Perceptions of Care
Source: Research Square preprint supplement (doi:10.21203/rs.3.rs-7465828/v1), 2025-09-19
Supplement: Supplementary file 1 [file 114bbfd4144ab5c7e42dde6a.docx]

**Title of Study**

**Adolescent Health Services in a Primary Care Facility in Northern Ghana: A Qualitative Investigation of Patients’, Guardians’ and Staff Perceptions of Care**

**Questions for Individual In-depth Interviews and Focus Groups**

**Patient Interview**

Thank you for agreeing to talk to us today. Just to recap, we are trying to find out about our patients’ experiences with healthcare and how we can improve our services. If you want to stop the interview or not answer one of the questions, you may do so at any time. Do you have any questions for me before we begin?

**Previous care experiences and reasons for the visits**

1. How many times have you been to Polyclinic in the last year?
2. What health concerns did you come with or discuss during those visits?
3. Tell me more about any other health concern in your life
4. Why do you choose to come to Polyclinic for health services instead of going to other clinics or health care providers?

**Experiences and perception about the consultation and outpatient service design**

1. What did you like about the visit with the doctors/care providers in the consulting room? ,
2. What did you not like about the visit with the doctors/care providers?
3. If we put you in charge of the clinic/OPD, what, if anything, would you change?
   - - 1. (Probe for provider knowledge, friendliness of providers, did the providers treat you respectfully, judgmental issues, been able to understand what the provider was saying or recommending, collaboration in decision taking or views considered or regarded?

***Example of follow up question for i, (How will you want the best adolescent friendly doctor to be like?)***

- - - 1. Physical layout of the clinic, flow of the clinic, information/services/Apps, clinic time,

***Example of follow up questions for ii (How were you able to find your way out from the beginning to the end? What, if any, were the things you like and the things you didn’t like?)***

- - - 1. Probe how s/he would make those changes)

**Experiences and perception about Registration, Waiting, Laboratory and Pharmacy Services**

1. Please tell me about your experience with the clinic staff during registration (record staff), nurses station, laboratory, pharmacy? (Probe for each staff category).
   1. If the patient has not identified any problems so far in the interview, probe for any problems they encountered with doctors, staff, services, etc. Or if they have identified problems, ask if they have had any other problems before moving on.

**Independent Consultation and other adolescent-specific health issues**

1. For patients under 18: Sometimes young people want to talk about a medical issue confidentially, without their parents involved. What are your opinions about being able to talk to a provider confidentially without your parent or guardian in the room?
2. How about been given an opportunity to talk to your doctor about any relevant issue about your health that worries you aside the main health problem that brought you to hospital?

Probe: Body image confusions, issues with unhealthy habits and lifestyles and any emotionally tormenting issue at home, school or friends? (Areas of adolescent health concerns using the **HEEADSSS* consultation technique**).

1. Is there anything you think I should have asked and I didn’t?

Thank you for taking the time to speak with me!

**Parent/Guardian Interviews**

Thank you for agreeing to talk to us today. Just to recap, we are trying to find out about our families’ experiences with healthcare for their teenager, and how we can improve our services. If you want to stop the interview or not answer one of the questions, you may do so at any time. Do you have any questions for me before we begin?

1. How many times have you brought any of your adolescent children to the Polyclinic in the last year?
2. What health concerns did they come with?
3. Why do you choose to come to Polyclinic for health services versus going to other clinics or health care providers?
4. What did you like about the visit with the doctors/care providers in the consulting room? ,
5. What did you not like about the visit with the doctors/care providers?
6. If we put you in charge of the clinic/OPD, what, if anything, would you change?
   1. (Probe for provider knowledge, friendliness of providers, did the providers treat you respectfully, judgmental issues, been able to understand what the provider was saying or recommending, collaboration in decision taking or views considered or regarded?

***Example of follow up question for i (How will you want the best adolescent friendly doctor to be like?)***

- 1. Physical layout of the clinic, flow of the clinic, information/services/Apps, clinic time,

***Example of follow up questions for ii (How were you able to find your way out from the beginning to the end? What, if any, were the things you like and the things you didn’t like?)***

- 1. Probe how s/he would make those changes)

1. Tell me about your experience with the clinic staff during registration (record staff), nurses station, laboratory, pharmacy? (Probe for each staff category).
   - 1. If the parent has not identified any problems so far in the interview, probe for any problems they encountered with doctors, staff, services, etc. Or if they have identified problems, ask if they have had any other problems before moving on.
2. For best practice, teenagers; especially older adolescents and young adults, ought to be given the option to have a consultation with their doctor alone. This helps the young person develop patient doctor relationship and builds trust and allows them to talk about issues they might want to keep confidential. What are your opinions about your teen talking to the provider confidentially without you in the room?
3. If an opportunity is given during consultation to discuss issues relevant to their health but outside the main health problem they came to clinic with, tell me your opinions about that?

Probe for body image, unhealthy habits and lifestyles to be discussed with your child? (Areas of adolescent health concerns using the **psychosocial history (HEEADSSS* consultation) technique**.

1. Is there anything you think I should have asked and I didn’t?

Thank you for taking the time to speak with me!

**Providers, Nurses, Managers, Staff Focus Groups**

Thank you for agreeing to talk to us today. Just to recap, we are trying to find out about the experiences of our clinic personnel with healthcare for young people ages 12-24, and how we can improve our services for this age group. Your participation is completely voluntary, and we are hopeful that together we can improve care here. Do you have any questions before we begin?

Group type (staff, providers, managers):

1. For the purposes of today’s discussion we will define young people as ages 12-24. In general, how many young people do you think we see per month?
2. What do you think are some of the health needs this patient population has that might be different than patients that are 25 or older?
3. Families, and patients in this age range have a choice of facilities to go to. Why do you think they might choose to come to the Polyclinic instead of going to a private clinic/hospital, a local gov’t clinic, or a traditional/local healer?
4. How well do you think the Polyclinic does in terms of creating a welcoming environment for this population? (Can probe for perceptions of knowledge/expertise, friendliness, respectfulness, use of language that the patients can understand, resources/information/programming specifically for youth; also probe for barriers/facilitators to addressing teen needs)
5. In your opinion how should an adolescent friendly, well-integrated, holistic care be like?
6. How competent are the clinical staff (doctors, nurses, pharmacies, lab scientist) in providing healthcare to this population (adequate training for care, knowledge of the problems of this age groups, friendliness, unconditional positive regard, involvement in care decision and planning, regard for autonomy)?
7. If you could improve this clinic for adolescents/youth, what changes would you make? (Can probe for services, layout of the clinic, clinic workflows, trainings needed for staff, or solutions to any of the problems outlined in the discussion)
8. Is there anything else we should know about care for adolescents here at the polyclinic?

**HEEADSSS*** is a consultation technique that assesses all adolescent problems in a single episode. **H**ome environment, **E**ducation and Employment, **E**ating and Exercise, Peer-related **A**ctivities, **D**rugs, alcohol, tobacco, **S**ex and Sexuality, **S**uicide, depression and other mental related issues and **S**afety from injury, violence, abuse. This question seek to explore their readiness for the use of this technique
